# Supplementary material for: Uncovering the Role of Biological Sex in the Divergent Genetic Profiles of Early and Late-Diagnosed Autism
Source: Research Square preprint supplement (doi:10.21203/rs.3.rs-9623041/v1), 2026-05-07
Supplement: Supplementary file 1 [file a60233bbd6089a40a20bf0bf.xlsx]

## Sheet: Table of Contents
Supplementarty Tables: Table of Contents
Table S1	Sample Characteristcis of All Includes Traits
Table S2	Genetic Correlations of Male and Female ASD with External Traits
Table S3	Genetic Correlations of Early and Late Diagnosed ASD with External Traits
Table S4	Male ASD Associations with External Traits Accounting for Early ASD Associations
Table S5	Female ASD Associations with External Traits Accounting for Early ASD Associations
Table S6	Early ASD Associations with External Traits Accounting for Male ASD Associations
Table S7	Early ASD Associations with External Traits Accounting for Female ASD Associations
Table S8	Genetic Correlations of Male and Female Diagnosed ASD with External Traits Accounting for Genetyic Overlap with the Internalizing Factor
Table S9	Genetic Correlations of Early and Late Diagnosed ASD with External Traits Accounting for Genetyic Overlap with the Internalizing Factor

## Sheet: Table S1
Table S1. Sample Characteristcis of All Includes Traits.
Phenotype	Shorthand	Category	Heritabilities calculated	Population prevalence	Cases	Controls	Continuous N	Citation
Childhood Intelligence	ChildhoodIntelligence	Cognitive	0.28	-	-	-	12441	Benyamin et al., 2014
Cognitive traits - Memory	Memory	Cognitive	0.04	-	-	-	331679	de la Fuente et al., 2021
Cognitive traits - Reaction time	RT	Cognitive	0.074	-	-	-	330024	de la Fuente et al., 2021
Cognitive traits - symbol digit substitution	SymbolDigit	Cognitive	0.11	-	-	-	87741	de la Fuente et al., 2021
Cognitive traits - Trail making test b	TMTB	Cognitive	0.149	-	-	-	78547	de la Fuente et al., 2021
Cognitive traits - Verbal numerical reasoning	VNR	Cognitive	0.212	-	-	-	171304	de la Fuente et al., 2021
Educational Attainment	EA	Cognitive	0.14	-	-	-	765283	Okbay et al., 2022
Intelligence	Intelligence	Cognitive	0.188	-	-	-	269867	Savage et a., 2018
Language Functional Connectivity	LanguageFunctionalConnectivity	Cognitive	0.38	-	-	-	32186	Mekki Y, Guillemot V, Lemaître H, Carrión-Castillo A, Forkel S, Frouin V, Philippe C. The genetic architecture of language functional connectivity. Neuroimage. 2022 Apr 1;249:118795. doi: 10.1016/j.neuroimage.2021.118795. Epub 2021 Dec 18. PMID: 34929384.
Noncognitive skills of educational attainment	NonCog	Cognitive	0.059	-	-	-	510795	Demange et al., 2021
Reading - nonword reading	NREAD	Cognitive	0.26	-	-	-	16746	Eising et al., 2022
Reading - phoneme awareness	PA	Cognitive	0.24	-	-	-	12411	Eising et al., 2022
Reading - spelling	SP	Cognitive	0.243	-	-	-	17278	Eising et al., 2022
Reading - word reading	WR	Cognitive	0.2	-	-	-	27180	Eising et al., 2022
Adulthood BMI	AdulthoodBMI	Health	0.21	-	-	-	given in column	Yengo et al., 2018
Age at first facial hair	FirstFacialHair_EUR	Health	0.13	-	-	-	186626	Pan-UKB team. https://pan.ukbb.broadinstitute.org. 2020.
Age at menarche	Menarche_EUR	Health	0.19	-	-	-	221139	Pan-UKB team. https://pan.ukbb.broadinstitute.org. 2020.
Age at menopause	Menopause_EUR	Health	0.12	-	-	-	130933	Pan-UKB team. https://pan.ukbb.broadinstitute.org. 2020.
Alzheimers disease	ALZ	Health	0.034	0.05	86531	676386	-	Wightman et al., 2021
Asthma	Asthma_EUR	Health	0.132	0.12	48560	371208	-	Pan-UKB team. https://pan.ukbb.broadinstitute.org. 2020.
Childhood BMI	ChildhoodBMI	Health	0.25	-	-	-	given in column	Felix et al., 2015
Diet - carbs	DietCarbs	Health	0.041	-	-	-	268922	Meddens et al., 2021
Diet - fat	DietFat	Health	0.03	-	-	-	268922	Meddens et al., 2021
Diet - protein	DietProtein	Health	0.028	-	-	-	268922	Meddens et al., 2021
Diet - sugar	DietSugar	Health	0.043	-	-	-	235391	Meddens et al., 2021
Hours of moderate exercise	HoursModEx	Health	0.03	-	-	-	312433	Pan-UKB team. https://pan.ukbb.broadinstitute.org. 2020.
Insomnia - dozing	Dozing	Health	0.12	0.026	10050	376498	-	Jansen et al., 2019
Insomnia - ease of getting up	GettingUp	Health	0.07	-	-	-	385949	Jansen et al., 2019
Insomnia - general	Insomnia	Health	0.08	0.28	109402	277131	-	Jansen et al., 2019
Insomnia - morningness	Morningness	Health	0.11	-	-	-	345552	Jansen et al., 2019
Insomnia - napping	Napping	Health	0.12	0.052	20102	366475	-	Jansen et al., 2019
Insomnia - sleep duration	SleepDuration	Health	0.07	-	-	-	384317	Jansen et al., 2019
Insomnia - snoring	Snoring	Health	0.07	0.373	134249	225667	-	Jansen et al., 2019
Migraine	Migraine	Health	0.17	0.12	3710	407934	-	Pan-UKB team. https://pan.ukbb.broadinstitute.org. 2020.
No exercise	NoExercise	Health	0.21	0.06	24889	393389	-	Pan-UKB team. https://pan.ukbb.broadinstitute.org. 2020.
Nocturnal Enuresis	BW_new	Health	0.3	0.11	3882	31073	-	Jørgensen et al., 2021
Sensitivity to environmental stress and adversity	SESA	Health	0.08	-	-	-	351 827	Nagel et al., 2020
Age at first sexual intercourse	AgeFirstSex	Health/Risk Taking	0.12	-	-	-	339614	Watanabe et al., 2019
ADHD	ADHD	Psychiatric	0.18	0.05	38691	186843	-	Demontis et al., 2023
Adulthood ADHD	adulthoodADHD	Psychiatric	0.27	0.03	6961	38303	-	Rajagopal et al., 2022
Alcohol Use Disorder	ALCH	Psychiatric	0.14	0.159	8485	20272	-	Walters et al., 2018
Anorexia Nervosa	AN	Psychiatric	0.16	0.009	8485	20272	-	Watson et al., 2019
Anxiety Disorder	ANX	Psychiatric	0.23	0.2	31977	82114	-	Purves et al., 2019
Autism Spectrum Disorder	ASD	Psychiatric	0.12	0.012	18381	27969	-	Grove et al., 2019
Bipolar Disorder	BIP	Psychiatric	0.12	0.02	59287	781022	-	O’Connell et al., 2025
Cannabis Use Disorder	CUD	Psychiatric	0.19	0.0475	14808	343726	-	Johnson et al., 2020
Childhood ADHD	childhoodADHD	Psychiatric	0.24	0.05	14878	38303	-	Rajagopal et al., 2022
Ever considered self-harm	ECSHarm	Psychiatric	0.05	0.148	23192	133524	-	Campos et al., 2020
Ever self-harmed	ESHarm	Psychiatric	0.02	0.05	6872	150008	-	Campos et al., 2020
Major Depressive Disorder	MDD	Psychiatric	0.07	0.16	412305	1588397	-	Adams et al., 2025
Obsessive Compulsive Disorder	OCD	Psychiatric	0.3	0.025	2688	7037	-	Arnold et al., 2018
Opioid Use Disorder	OCD	Psychiatric	0.19	0.1	3211	11589	-	Polimanti et al., 2020
PTSD	PTSD	Psychiatric	0.05	0.12	141479	1113329	-	Nievergelt et al., 2024
Schizophrenia	SCZ	Psychiatric	0.22	0.01	53386	77258	-	Trubetskoy et al., 2022
Suicide attempt	SUI	Psychiatric	0.08	0.02	26590	492022	-	Mullins et al., 2022
Tourette's Syndrome	TS	Psychiatric	0.22	0.008	4819	9488	-	Yu et al., 2019
Risk taking - automobile speeding propensity	Rspeed	Risk Taking	0.06	-	-	-	404291	Linnér et al., 2019
Risk taking - general risk tolerance	Rgeneral	Risk Taking	0.052	-	-	-	466571	Linnér et al., 2019
Risk taking - number of sexual partners	Rsexpartners	Risk Taking	0.1	-	-	-	370711	Linnér et al., 2019
Ability to confide	AbilityToCONFIDE	Social relationships	0.04	-	-	-	408245	Pan-UKB team. https://pan.ukbb.broadinstitute.org. 2020.
Aggression (childhood)	AGG	Social Relationships	0.026	-	-	-	given in column	Ip et al., 2021
Family satisfaction	FAM_SAT	Social relationships	0.06	-	-	-	137019	Pan-UKB team. https://pan.ukbb.broadinstitute.org. 2020.
Frequency of family and friends visit	FREQ_FAM	Social relationships	0.04	-	-	-	417837	Pan-UKB team. https://pan.ukbb.broadinstitute.org. 2020.
Friendship satisfaction	FRIEND_SAT	Social relationships	0.06	-	-	-	136774	Pan-UKB team. https://pan.ukbb.broadinstitute.org. 2020.
Social interction and isolation - loneliness	Loneliness	Social relationships	0.07	0.18	80134	364890	-	Day et al., 2018
Social interction and isolation - pub or social group	Lpub	Social relationships	0.05	0.27	124047	328255	-	Day et al., 2018
Social interction and isolation - religious group	Lrel	Social relationships	0.05	0.27	124047	328255	-	Day et al., 2018
Social interction and isolation - sports group	Lsports	Social relationships	0.04	0.3	135060	317242	-	Day et al., 2018
Note. This table describes the summary statistics of all external traits included in the analyses. Citations are included for easy reproducability, as well as population prevalences used for the analyses. Sample sizes are given as number of cases and controls for binary traits and as total sample sizes for continuous traits.

## Sheet: Table S2
Table S2. Genetic Correlations of Male and Female Diagnosed ASD with External Traits.
External Trait	ASD Male				ASD Female			Chi-Square Difference Test p-value
	rG	SE	p-value		rG	SE	p-value
Risk taking - automobile speeding propensity	-0.0378544	0.0419681	0.367067		-0.261136	0.066701	9.03922e-05	0.000543592
Anorexia Nervosa	0.116093	0.0556412	0.0369372		0.374851	0.0846912	9.59563e-06	0.00107445
Risk taking - general risk tolerance	0.0812974	0.0425744	0.0561927		-0.0686958	0.070622	0.33069	0.0292416
Reading - nonword reading	0.132476	0.074217	0.0742652		-0.106061	0.0962815	0.270647	0.0299747
Risk taking - number of sexual partners	0.203463	0.0406722	5.65901e-07		0.0871363	0.0607188	0.151264	0.0329464
ADHD	0.505276	0.0486218	2.69786e-25		0.390963	0.0690469	1.49371e-08	0.0646996
No exercise	0.193896	0.0564253	0.000589647		0.350572	0.0764788	4.56368e-06	0.067669
Major Depressive Disorder	0.403129	0.0344507	1.25044e-31		0.495323	0.0543441	7.89885e-20	0.0769367
Opioid Use Disorder	0.00970727	0.11887	0.934915		-0.336499	0.185581	0.0697971	0.0787188
Diet - carbs	-0.00605999	0.0560691	0.913932		0.127233	0.0711057	0.0735588	0.0828667
Age at menarche	-0.0348901	0.0332078	0.293415		-0.112157	0.0492335	0.0227222	0.0933473
Age at first facial hair	0.0021387	0.0432393	0.960551		-0.107791	0.0616972	0.0806214	0.0966955
Social interction and isolation - pub or social group	-0.0589405	0.0523341	0.260066		-0.176953	0.0632375	0.00513845	0.10293
Autism Spectrum Disorder	0.985963	0.0706472	2.88572e-44		0.892892	0.0961069	1.53402e-20	0.102959
Friendship satisfaction	-0.407345	0.0595287	7.7642e-12		-0.558183	0.0862722	9.79899e-11	0.105992
Noncognitive skills of educational attainment	0.01343	0.043628	0.758213		-0.0799088	0.0545827	0.143196	0.107243
Hours of moderate exercise	0.0342864	0.056528	0.544157		-0.102636	0.074675	0.169307	0.111575
Suicide attempt	0.36491	0.0511436	9.67807e-13		0.513746	0.0923015	2.60727e-08	0.113939
Aggression (childhood)	0.51284	0.0767552	2.36512e-11		0.318645	0.100733	0.00156002	0.114007
Schizophrenia	0.303582	0.0355401	1.31948e-17		0.215948	0.0512752	2.53632e-05	0.137362
Insomnia - napping	0.224249	0.0646323	0.000521207		0.0986846	0.0816768	0.226958	0.157172
Reading - word reading	0.090989	0.0739121	0.218307		-0.057279	0.0957885	0.549858	0.176481
Alcohol Use Disorder	0.184684	0.0979716	0.0594196		0.00144646	0.132019	0.991258	0.185154
Childhood ADHD	0.489344	0.0633066	1.07757e-14		0.388393	0.0755338	2.71853e-07	0.205243
Social interction and isolation - religious group	-0.00743083	0.0461098	0.871971		0.0731549	0.0649752	0.260212	0.216934
Anxiety Disorder	0.367082	0.0582445	2.93013e-10		0.478159	0.0882167	5.9505e-08	0.223825
Frequency of family and friends visit	-0.30546	0.0491412	5.10058e-10		-0.223059	0.0665685	0.000805719	0.250451
Adulthood ADHD	0.36429	0.0649975	2.08647e-08		0.264203	0.0860392	0.00213535	0.258553
Social interction and isolation - sports group	-0.219651	0.0460561	1.84944e-06		-0.293107	0.0660726	9.15868e-06	0.292114
Migraine	0.447593	0.100537	8.50739e-06		0.288022	0.141492	0.0417902	0.2974
Insomnia - dozing	0.259122	0.07503	0.000553205		0.129252	0.115399	0.262694	0.318365
Age at first sexual intercourse	0.00129377	0.035846	0.971209		0.055011	0.0562364	0.32797	0.331325
Obsessive Compulsive Disorder	0.0771526	0.0859432	0.369337		0.210634	0.138389	0.127999	0.344251
Reading - phoneme awareness	0.146693	0.0859575	0.0878999		0.0151307	0.126494	0.904788	0.359061
Adulthood BMI	0.0590266	0.0336682	0.0795705		0.0165598	0.0501028	0.74101	0.377883
Cognitive traits - Trail making test b	0.0636702	0.048539	0.18961		0.128548	0.0695117	0.0644152	0.378884
Social interction and isolation - loneliness	0.357429	0.0498664	7.62551e-13		0.417966	0.0631037	3.50839e-11	0.397656
Insomnia - snoring	-0.0376281	0.0420601	0.370987		-0.0924475	0.0588408	0.116149	0.398352
Age at menopause	-0.00882288	0.0512347	0.863276		-0.0711895	0.0746515	0.340274	0.399518
Cognitive traits - symbol digit substitution	0.00216788	0.0528762	0.967297		0.069175	0.0746023	0.353797	0.426762
Reading - spelling	0.0788685	0.0817533	0.334688		-0.0214118	0.115103	0.852426	0.435668
Educational Attainment	0.118889	0.0353197	0.000762474		0.083344	0.0460673	0.0704228	0.436948
Bipolar Disorder	0.317333	0.0426924	1.06157e-13		0.271229	0.0569412	1.90441e-06	0.445295
Nocturnal Enuresis	0.191464	0.144952	0.186544		0.0374345	0.183134	0.838033	0.505055
Diet - fat	0.0287554	0.0641948	0.654197		-0.0257423	0.0857732	0.764085	0.508373
Ever self-harmed	0.532168	0.0905169	4.12228e-09		0.631906	0.143107	1.00721e-05	0.518387
Childhood BMI	0.0416164	0.0636304	0.51309		-0.0151121	0.0888641	0.864964	0.544371
PTSD	0.459256	0.0455154	6.11001e-24		0.499553	0.067413	1.25979e-13	0.554145
Insomnia - general	0.132578	0.0421354	0.0016525		0.172864	0.0626737	0.00581274	0.565248
Ability to confide	-0.19849	0.0455773	1.33051e-05		-0.240062	0.0678639	0.000404081	0.594026
Insomnia - sleep duration	-0.0432311	0.0426947	0.311269		-0.0768616	0.0552263	0.163996	0.606288
Cognitive traits - Verbal numerical reasoning	0.154766	0.0387094	6.38405e-05		0.182247	0.0558261	0.00109642	0.61313
Diet - sugar	-0.140755	0.0607588	0.0205241		-0.0979339	0.0765429	0.200733	0.619105
Ever considered self-harm	0.582366	0.0656189	6.99521e-19		0.634102	0.105025	1.56388e-09	0.636135
Family satisfaction	-0.370508	0.0567993	6.88672e-11		-0.417408	0.0911852	4.70381e-06	0.639728
Sensitivity to environmental stress and adversity	0.180046	0.0401305	7.23997e-06		0.205705	0.058247	0.000413054	0.665534
Childhood Intelligence	0.0867674	0.0879692	0.323967		0.14488	0.134138	0.280104	0.681351
Insomnia - ease of getting up	-0.262594	0.0372514	1.79892e-12		-0.287173	0.0586267	9.66541e-07	0.69178
Cognitive traits - Memory	0.0487832	0.0555327	0.379694		0.0252565	0.0710936	0.722397	0.744344
Insomnia - morningness	-0.159308	0.0365824	1.332e-05		-0.176096	0.051301	0.000597812	0.766424
Cannabis Use Disorder	0.0888842	0.0679734	0.190998		0.117499	0.0941795	0.212174	0.77596
Cognitive traits - Reaction time	0.0616662	0.0401948	0.124984		0.0445136	0.0635348	0.483541	0.806185
Diet - protein	0.0159602	0.0725173	0.825802		-0.00601504	0.0951796	0.94961	0.817521
Alzheimers disease	-0.0403311	0.0673583	0.549336		-0.0613263	0.0848742	0.469953	0.836072
Intelligence	0.192781	0.0353069	4.75776e-08		0.185092	0.0520277	0.000374297	0.878408
Tourette's Syndrome	0.140103	0.0653167	0.0319543		0.129919	0.120081	0.279287	0.930278
Language Functional Connectivity	-0.02506	0.0302268	0.407068		-0.027796	0.0444604	0.531848	0.953584
Asthma	0.142967	0.0449709	0.00147734		0.141224	0.0685657	0.039428	0.979908
Note. Genetic correlations of male and female diagnosed ASD with the external traits. The table includes the standard errors of the genetic correlations, as well as the p-value and a p-value for the difference between the male and female correlations. Genetic correlations are ordered by p-value of the difference test and significant correlations at a FDR corrected threshold are denoted in bold.

## Sheet: Table S3
Table S3. Genetic Correlations of Early and Late Diagnosed ASD with External Traits.
External Trait	Early Diagnosed ASD				Late Diagnosed ASD			Chi-Square Difference Test p-value
	rG	SE	p-value		rG	SE	p-value
Major Depressive Disorder	0.123936	0.0326141	0.000144648		0.569574	0.040597	1.02204e-44	7.97705e-21
PTSD	0.108928	0.0397698	0.00616343		0.566484	0.0462921	1.96818e-34	4.72007e-16
Social interction and isolation - sports group	0.0923017	0.0433808	0.0333611		-0.346012	0.0454306	2.6108e-14	1.40022e-15
ADHD	0.193961	0.0498605	0.000100216		0.602975	0.0519782	4.09459e-31	1.81991e-15
Social interction and isolation - loneliness	0.0942487	0.0449664	0.0360839		0.44819	0.0486673	3.28379e-20	2.47341e-09
Ever considered self-harm	0.177479	0.0716615	0.013263		0.715618	0.0662369	3.29798e-27	3.14668e-09
Insomnia - general	-0.0793397	0.0461033	0.0852664		0.271464	0.0472056	8.88892e-09	4.25349e-08
Suicide attempt	0.0634628	0.0702204	0.36612		0.485262	0.0588058	1.5584e-16	3.21599e-07
Noncognitive skills of educational attainment	0.173867	0.0389463	8.03394e-06		-0.0837132	0.0426026	0.0494169	6.19926e-07
Adulthood ADHD	0.0189001	0.0665665	0.776465		0.429884	0.0744925	7.88799e-09	1.03009e-06
Friendship satisfaction	-0.158048	0.0527898	0.00275432		-0.518992	0.0610104	1.79069e-17	3.72415e-06
Anxiety Disorder	0.170035	0.0560581	0.00241981		0.48912	0.0594072	1.82067e-16	1.76426e-05
Insomnia - ease of getting up	-0.106475	0.0379079	0.00497302		-0.320294	0.0363206	1.15967e-18	2.25107e-05
Social interction and isolation - pub or social group	0.0397475	0.0464788	0.392455		-0.198481	0.0453543	1.20749e-05	5.01737e-05
Sensitivity to environmental stress and adversity	0.0680655	0.0400883	0.0895284		0.255109	0.0431722	3.43962e-09	0.000128852
No exercise	-0.00713261	0.061944	0.908329		0.280053	0.0551063	3.73395e-07	0.000168006
Bipolar Disorder	0.174637	0.0482821	0.000298018		0.394324	0.0430906	5.6385e-20	0.00018191
Childhood ADHD	0.236191	0.063183	0.00018534		0.5068	0.0695257	3.11342e-13	0.000290124
Frequency of family and friends visit	-0.171626	0.0484929	0.000401353		-0.400758	0.0439569	7.71894e-20	0.000389571
Cognitive traits - symbol digit substitution	-0.206787	0.0565325	0.000254344		0.038051	0.0571453	0.505498	0.000627814
Educational Attainment	0.228863	0.033538	8.85359e-12		0.0962963	0.0313019	0.00209537	0.000766535
Aggression (childhood)	0.210269	0.0738561	0.00441319		0.521457	0.0754389	4.76828e-12	0.00142567
Asthma	0.0242273	0.0498909	0.627247		0.215462	0.049211	1.19591e-05	0.00159518
Ever self-harmed	0.208843	0.0887829	0.0186583		0.573084	0.0981019	5.1663e-09	0.00321046
Ability to confide	-0.0500165	0.0420597	0.23437		-0.225082	0.0498602	6.35373e-06	0.00373088
Cognitive traits - Memory	-0.0941284	0.0470565	0.0454651		0.0806621	0.0538859	0.134418	0.00565336
Cognitive traits - Trail making test b	-0.0779249	0.0510099	0.126601		0.130584	0.06204	0.0353053	0.00619743
Family satisfaction	-0.227724	0.0546667	3.10426e-05		-0.428065	0.0636764	1.78619e-11	0.00901946
Anorexia Nervosa	0.10214	0.0540086	0.0585993		0.288289	0.0598432	1.4544e-06	0.0117424
Insomnia - morningness	-0.0394612	0.036064	0.273868		-0.153386	0.0360535	2.09602e-05	0.0179297
Insomnia - dozing	0.0634254	0.0776772	0.4142		0.289721	0.0804053	0.000314251	0.0182048
Insomnia - napping	0.121739	0.0561635	0.0301911		0.297635	0.062254	1.74447e-06	0.0254952
Risk taking - general risk tolerance	-0.0117666	0.0446248	0.792028		0.102756	0.044039	0.019632	0.0332092
Age at menopause	0.0593351	0.0461981	0.199015		-0.0725792	0.0510553	0.155148	0.0355259
Diet - carbs	-0.0932603	0.0507628	0.0661838		0.0567432	0.0544277	0.29716	0.0363874
Adulthood BMI	-0.00993103	0.0358027	0.781487		0.0742583	0.0302276	0.0140244	0.037658
Childhood Intelligence	0.27332	0.0862734	0.00153457		0.0354959	0.0988154	0.719435	0.0541303
Hours of moderate exercise	-0.168219	0.0561705	0.00274629		-0.0312076	0.0569219	0.583518	0.0659666
Reading - nonword reading	0.213261	0.0736771	0.00379718		0.0473268	0.0737549	0.521083	0.0930222
Cognitive traits - Reaction time	-0.0286646	0.0441731	0.516393		0.0672813	0.0403357	0.0953094	0.103885
Alcohol Use Disorder	0.0434003	0.092563	0.639161		0.236117	0.0988743	0.016938	0.112275
Risk taking - number of sexual partners	0.12562	0.0436627	0.00401395		0.199163	0.0427846	3.23942e-06	0.117731
Age at menarche	-0.0968675	0.0344255	0.00489552		-0.0238251	0.0364978	0.513898	0.132273
Reading - spelling	0.159669	0.0716786	0.0259095		0.0135341	0.079548	0.864902	0.151058
Migraine	0.133738	0.092303	0.147365		0.310601	0.109639	0.00461235	0.170458
Diet - protein	0.0883298	0.0656426	0.178426		-0.0196723	0.0634092	0.756376	0.196382
Insomnia - sleep duration	-0.00573957	0.0422192	0.891863		-0.078488	0.0417022	0.0598213	0.202798
Intelligence	0.17639	0.0351068	5.05066e-07		0.235894	0.0400791	3.96339e-09	0.211313
Schizophrenia	0.237296	0.0405919	5.03818e-09		0.295888	0.0359198	1.75886e-16	0.216503
Reading - word reading	0.136978	0.0749724	0.0676936		0.017725	0.0672175	0.792014	0.228069
Alzheimers disease	0.0189785	0.0590306	0.747829		-0.0790441	0.0665668	0.235054	0.264154
Age at first sexual intercourse	0.0374865	0.0401107	0.350007		-0.0162378	0.038309	0.671665	0.264839
Cognitive traits - Verbal numerical reasoning	0.157188	0.0392626	6.24091e-05		0.212314	0.0407641	1.90518e-07	0.289852
Nocturnal Enuresis	-0.0375513	0.143823	0.794021		0.16314	0.142574	0.252522	0.296487
Diet - fat	0.0903034	0.0601192	0.133078		0.0118914	0.065178	0.855234	0.312499
Risk taking - automobile speeding propensity	-0.0447312	0.0447773	0.317809		-0.0871495	0.044404	0.0496872	0.42097
Age at first facial hair	0.00963181	0.0393501	0.806633		-0.0301408	0.0474955	0.525687	0.473626
Social interction and isolation - religious group	0.0324344	0.04785	0.497877		-0.0042907	0.04596	0.92562	0.501249
Cannabis Use Disorder	0.0674185	0.0577303	0.24288		0.106655	0.0682168	0.117943	0.61453
Autism Spectrum Disorder	0.863655	0.0790025	8.10498e-28		0.825716	0.0809521	1.9817e-24	0.618137
Obsessive Compulsive Disorder	0.0861859	0.0848817	0.309932		0.129884	0.0848115	0.12566	0.682584
Opioid Use Disorder	-0.0845291	0.124547	0.497332		-0.0180916	0.12674	0.886491	0.697307
Language Functional Connectivity	-0.0134208	0.0310689	0.665763		-0.000599184	0.032273	0.985187	0.746
Diet - sugar	-0.148214	0.0520792	0.00442817		-0.129723	0.060198	0.0311661	0.807563
Reading - phoneme awareness	0.075493	0.076515	0.323818		0.0945585	0.0833079	0.256355	0.860219
Insomnia - snoring	-0.0179667	0.0430781	0.676625		-0.027362	0.0454141	0.546841	0.879447
Tourette's Syndrome	0.107077	0.0708492	0.130703		0.111612	0.0725137	0.12376	0.961386
Childhood BMI	0.0748015	0.0679919	0.271265		0.0779989	0.0643322	0.225345	0.969376
Note. Genetic correlations of early and late diagnosed ASD with the external traits. The table includes the standard errors of the genetic correlations, as well as the p-value and a p-value for the difference between the early and late diagnosed correlations. Genetic correlations are ordered by p-value of the difference test and significant correlations at a FDR corrected threshold are denoted in…

## Sheet: Table S4
Table S4. Male ASD Associations with External Traits Accounting for Early ASD Associations.
External Trait	ASD Male				Early Diagnosed ASD
	rG	SE	p-value		rG	SE	p-value
Anorexia Nervosa	0.0905659	0.152793	0.553359		0.0338576	0.149923	0.821331
Risk taking - automobile speeding propensity	-0.00956781	0.115111	0.933758		-0.0375175	0.117481	0.749462
Note. Partial genetic correlations of male and early diagnosed ASD with the external traits that were significantly differently associated with male and female ASD. The table includes the standard errors of the genetic correlations, as well as the FDR corrected p-value.

## Sheet: Table S5
Table S5. Female ASD Associations with External Traits Accounting for Early ASD Associations.
External Trait	ASD Female				Early Diagnosed ASD
	rG	SE	p-value		rG	SE	p-value
Anorexia Nervosa	0.406548	0.132847	0.00221141		-0.0734064	0.0988688	0.457807
Risk taking - automobile speeding propensity	-0.297243	0.0969081	0.00216028		0.0836178	0.0739259	0.258012
Note. Partial genetic correlations of female and early diagnosed ASD with the external traits that were significantly differently associated with male and female ASD. The table includes the standard errors of the genetic correlations, as well as the FDR corrected p-value.

## Sheet: Table S6
Table S6. Early ASD Associations with External Traits Accounting for Male ASD Associations.
External Trait	Early Diagnosed ASD				ASD Male
	rG	SE	p-value		rG	SE	p-value
Ability to confide	0.230883	0.162931	0.156465		-0.372566	0.164065	0.0231566
ADHD	-0.433314	0.228173	0.0575571		0.831976	0.216531	0.000121888
Adulthood ADHD	-0.592655	0.24196	0.0143098		0.811127	0.244061	0.000889083
Aggression (childhood)	-0.408739	0.266653	0.125312		0.821012	0.25955	0.00156037
Anorexia Nervosa	0.0338576	0.149923	0.821331		0.0905659	0.152793	0.553359
Anxiety Disorder	-0.247317	0.202879	0.222829		0.553549	0.205388	0.00703598
Asthma	-0.193637	0.150993	0.199693		0.288961	0.148532	0.0517214
Bipolar Disorder	-0.149737	0.151096	0.321682		0.430228	0.149005	0.00388524
Childhood ADHD	-0.307623	0.190296	0.105976		0.721279	0.190793	0.000156564
Cognitive traits - Memory	-0.303347	0.155717	0.0514066		0.277494	0.15954	0.0819752
Cognitive traits - symbol digit substitution	-0.482963	0.178508	0.00681908		0.366301	0.170493	0.0316752
Cognitive traits - Trail making test b	-0.291809	0.16661	0.0798695		0.283682	0.16304	0.0818684
Educational Attainment	0.322621	0.114283	0.00475747		-0.124354	0.114138	0.275931
Ever considered self-harm	-0.606191	0.304604	0.0465805		1.03941	0.297894	0.000484494
Ever self-harmed	-0.445812	0.33321	0.180919		0.868291	0.331667	0.00884561
Family satisfaction	0.119624	0.179511	0.505165		-0.460699	0.180088	0.0105219
Frequency of family and friends visit	0.135973	0.16326	0.404925		-0.407978	0.162634	0.0121224
Friendship satisfaction	0.345438	0.216316	0.110285		-0.667791	0.219946	0.00239611
Insomnia - dozing	-0.30574	0.229509	0.182812		0.489637	0.225836	0.0301506
Insomnia - ease of getting up	0.212051	0.141683	0.134482		-0.422471	0.14375	0.00329354
Insomnia - general	-0.415476	0.180553	0.0213843		0.44583	0.174406	0.0105798
Insomnia - morningness	0.186887	0.128274	0.145134		-0.300213	0.128249	0.0192395
Major Depressive Disorder	-0.42	0.2	0.0327		0.72	0.2	0.000255
No exercise	-0.355284	0.196108	0.0700361		0.461765	0.193524	0.0170288
Noncognitive skills of educational attainment	0.379428	0.155932	0.0149619		-0.272643	0.153862	0.0763952
PTSD	-0.549954	0.247507	0.0262851		0.873898	0.245932	0.000380266
Sensitivity to environmental stress and adversity	-0.156834	0.131581	0.233295		0.298292	0.135175	0.0273345
Social interction and isolation - loneliness	-0.406067	0.215748	0.0598181		0.663586	0.218403	0.00237874
Social interction and isolation - pub or social group	0.195079	0.153102	0.2026		-0.206022	0.155998	0.186611
Social interction and isolation - sports group	0.597638	0.216183	0.00570099		-0.670245	0.213188	0.00166701
Suicide attempt	-0.490476	0.251596	0.0512409		0.734708	0.241292	0.00232769
Note. Partial genetic correlations of male and early diagnosed ASD with the external traits that were significantly differently associated with early and late diagnosed ASD. The table includes the standard errors of the genetic correlations, as well as the FDR corrected p-value.

## Sheet: Table S7
Table S7. Early ASD Associations with External Traits Accounting for Female ASD Associations.
External Trait	Early Diagnosed ASD				ASD Female
	rG	SE	p-value		rG	SE	p-value
Ability to confide	0.0659358	0.0767103	0.390041		-0.268533	0.104206	0.00996757
ADHD	0.0309055	0.080026	0.699354		0.377618	0.0953052	7.42625e-05
Adulthood ADHD	-0.116996	0.0910068	0.19859		0.314722	0.116611	0.00695693
Aggression (childhood)	0.0893348	0.109798	0.415857		0.280071	0.130214	0.0314876
Anorexia Nervosa	-0.0734064	0.0988688	0.457807		0.406548	0.132847	0.00221141
Anxiety Disorder	-0.0447835	0.107588	0.677227		0.497497	0.146269	0.000670782
Asthma	-0.0451762	0.0675552	0.503667		0.160731	0.0889743	0.0708419
Bipolar Disorder	0.0707035	0.070258	0.314252		0.240699	0.0830292	0.00374392
Childhood ADHD	0.084178	0.0910886	0.355417		0.352046	0.106573	0.000955454
Insomnia - dozing	0.00935951	0.106752	0.930135		0.125211	0.144607	0.386561
Educational Attainment	0.237079	0.0479405	7.60376e-07		-0.0190263	0.0585683	0.745289
Ever considered self-harm	-0.118402	0.139767	0.396921		0.685228	0.18778	0.00026317
Ever self-harmed	-0.0786842	0.152785	0.606554		0.665882	0.219874	0.00245789
Family satisfaction	-0.0583708	0.0948487	0.538284		-0.392203	0.127501	0.00209736
Frequency of family and friends visit	-0.0925682	0.0728537	0.203869		-0.183088	0.0915796	0.0455839
Friendship satisfaction	0.101992	0.11835	0.388809		-0.602223	0.152677	7.99939e-05
Insomnia - ease of getting up	0.0215428	0.0704107	0.759636		-0.296475	0.0910073	0.00112316
Insomnia - general	-0.189272	0.0715294	0.0081432		0.254592	0.0897426	0.00455526
Social interction and isolation - loneliness	-0.10599	0.0910109	0.244185		0.463732	0.11947	0.000103777
Social interction and isolation - pub or social group	0.142776	0.0716728	0.046365		-0.238603	0.0876732	0.00649845
Social interction and isolation - sports group	0.269025	0.087701	0.00215841		-0.409272	0.107257	0.000135748
Major Depressive Disorder	-0.110557	0.0866475	0.201977		0.543061	0.122759	9.69782e-06
Cognitive traits - Memory	-0.129106	0.0677834	0.0568212		0.0810043	0.0886641	0.360922
Insomnia - morningness	0.0449596	0.061627	0.46567		-0.195509	0.0751627	0.00929118
No exercise	-0.194836	0.0971458	0.0448982		0.434702	0.123654	0.000438965
Noncognitive skills of educational attainment	0.256127	0.0697241	0.000239316		-0.190504	0.0840779	0.0234635
PTSD	-0.13125	0.094439	0.164593		0.556226	0.134059	3.33749e-05
Sensitivity to environmental stress and adversity	-0.025515	0.062995	0.685454		0.216723	0.081491	0.00782644
Suicide attempt	-0.194668	0.127427	0.126592		0.597803	0.170831	0.000466338
Cognitive traits - symbol digit substitution	-0.290894	0.091952	0.00155862		0.194783	0.110832	0.0788397
Cognitive traits - Trail making test b	-0.164012	0.079214	0.0384068		0.199368	0.0994356	0.0449639
Note. Partial genetic correlations of female and early diagnosed ASD with the external traits that were significantly differently associated with early and late diagnosed ASD. The table includes the standard errors of the genetic correlations, as well as the FDR corrected p-value.

## Sheet: Table S8
Table S8. Genetic Correlations of Male and Female Diagnosed ASD with External Traits Accounting for Genetyic Overlap with the Internalizing Factor.
External Trait	ASD Male				ASD Female			Chi-Square Difference Test p-value
	rG	SE	p-value		rG	SE	p-value
Risk taking - number of sexual partners	0.0684506	0.040984	0.0948846		-0.073803	0.0624579	0.237349	0.000199137
Risk taking - automobile speeding propensity	0.0649182	0.0418234	0.120614		-0.138332	0.065471	0.034611	0.000364905
Anorexia Nervosa	-0.0127613	0.0574273	0.824151		0.220803	0.0840717	0.00863022	0.00107473
ADHD	0.230413	0.0457535	4.75403e-07		0.0643536	0.0649079	0.321464	0.00190378
Aggression (childhood)	0.258025	0.0768245	0.000783317		0.0157042	0.0987697	0.873669	0.00970748
Risk taking - general risk tolerance	-0.0158026	0.0433603	0.715518		-0.184389	0.0699058	0.0083473	0.0173555
Autism Spectrum Disorder	0.831613	0.0684072	5.27876e-34		0.714508	0.092664	1.25086e-14	0.0211794
Social interction and isolation - religious group	0.0811228	0.0462945	0.0797207		0.17884	0.067059	0.00765544	0.0232574
Schizophrenia	0.140118	0.0365493	0.000126245		0.0208761	0.0534901	0.69633	0.0354453
Opioid Use Disorder	-0.125172	0.119184	0.293605		-0.497068	0.183047	0.00661709	0.0358378
Hours of moderate exercise	-0.0605403	0.0573655	0.291267		-0.215881	0.0752199	0.00410475	0.0403292
Childhood ADHD	0.279898	0.0618282	5.98193e-06		0.139332	0.0744544	0.0612949	0.0468638
Reading - nonword reading	0.163826	0.0749279	0.0287827		-0.0682502	0.0963215	0.478591	0.0569147
Alcohol Use Disorder	-0.078692	0.0997451	0.430155		-0.313049	0.132379	0.0180403	0.0935468
Frequency of family and friends visit	-0.312791	0.0490124	1.74929e-10		-0.232187	0.0681243	0.000653719	0.112869
Bipolar Disorder	0.093713	0.0402794	0.0199881		0.00428654	0.0583531	0.941438	0.114365
Insomnia - napping	0.113686	0.0617973	0.0658182		-0.0333621	0.0796775	0.675426	0.122387
Diet - carbs	0.00933487	0.0561701	0.868009		0.145587	0.0725371	0.0447413	0.133529
Social interction and isolation - pub or social group	-0.0534808	0.0531015	0.313864		-0.170463	0.0641455	0.00787347	0.136737
Age at first facial hair	0.0296829	0.0430965	0.490976		-0.0748336	0.0627109	0.232749	0.142437
Age at first sexual intercourse	0.171476	0.034654	7.48915e-07		0.257487	0.060228	1.90971e-05	0.145236
Migraine	0.209045	0.0976684	0.032326		0.00383942	0.13735	0.977699	0.151746
Age at menarche	-0.00540943	0.0338305	0.872965		-0.0769327	0.0493541	0.119046	0.156803
No exercise	-0.0145932	0.0571904	0.798591		0.101898	0.0759097	0.17948	0.177392
Friendship satisfaction	-0.300842	0.0598425	4.9763e-07		-0.43066	0.0870652	7.55962e-07	0.181142
Insomnia - snoring	-0.0668913	0.0432904	0.122303		-0.127437	0.0607947	0.0360661	0.19949
Obsessive Compulsive Disorder	-0.00723365	0.0876998	0.934263		0.109703	0.137245	0.424108	0.216265
Adulthood ADHD	0.0608696	0.0619763	0.326033		-0.0971772	0.0887319	0.273439	0.28461
Reading - word reading	0.14774	0.0742315	0.0465606		0.0107639	0.0970812	0.91172	0.296125
Insomnia - dozing	0.120809	0.0733007	0.099328		-0.0359155	0.113754	0.75221	0.320461
Nocturnal Enuresis	0.132891	0.144573	0.357993		-0.0326092	0.181211	0.85719	0.363137
Reading - spelling	0.12943	0.0824308	0.116377		0.0391125	0.118426	0.741198	0.396889
Noncognitive skills of educational attainment	0.0998341	0.0430448	0.0203786		0.0232916	0.0562967	0.679068	0.422467
Childhood Intelligence	0.196141	0.0875099	0.0250029		0.275646	0.13067	0.0349028	0.468842
Social interction and isolation - sports group	-0.0586718	0.0461128	0.203248		-0.100917	0.0672797	0.133626	0.49413
Childhood BMI	0.026791	0.065193	0.68111		-0.0327963	0.0880409	0.709512	0.544659
Ability to confide	-0.0966305	0.0480727	0.0444207		-0.118452	0.06907	0.0863543	0.550417
Diet - fat	0.032384	0.0652603	0.619734		-0.0212847	0.0855693	0.803561	0.57832
Diet - sugar	-0.123784	0.0614248	0.0438836		-0.0777637	0.0782013	0.320027	0.595165
Cognitive traits - symbol digit substitution	0.109126	0.0537515	0.0423363		0.196935	0.0742649	0.00800657	0.623432
Adulthood BMI	-0.00951579	0.0340961	0.780178		-0.0651876	0.0508176	0.19957	0.624055
Ever self-harmed	0.236153	0.094569	0.0125196		0.278595	0.135254	0.0394187	0.680128
Cognitive traits - Memory	0.107007	0.0541568	0.0481693		0.0948691	0.0724963	0.190669	0.701196
Tourette's Syndrome	0.0432315	0.0654159	0.508693		0.0141511	0.120882	0.906807	0.712929
Diet - protein	0.0040343	0.073099	0.955987		-0.0203178	0.0970055	0.834095	0.73785
Asthma	0.0312863	0.0443663	0.480699		0.0079576	0.0698867	0.90934	0.771202
Insomnia - sleep duration	0.0190991	0.0437421	0.66238		-0.00239444	0.0571132	0.966557	0.7746
Cognitive traits - Reaction time	0.0828676	0.0410122	0.043325		0.0699467	0.0632001	0.268402	0.801438
Ever considered self-harm	0.259817	0.06618	8.63997e-05		0.248936	0.0965575	0.00993421	0.832388
Language Functional Connectivity	-0.0260704	0.0302898	0.389406		-0.0290134	0.044012	0.509757	0.952293
Alzheimers disease	-0.0800925	0.0695793	0.249693		-0.108817	0.0845871	0.198288	1
Cannabis Use Disorder	-0.1087	0.0672884	0.106217		-0.118125	0.0958335	0.217723	1
Educational Attainment	0.250147	0.035215	1.2169e-12		0.239558	0.0468307	3.13078e-07	1
Family satisfaction	-0.204217	0.0557144	0.000246931		-0.21867	0.0886027	0.0135875	1
Insomnia - ease of getting up	-0.160775	0.0369302	1.33995e-05		-0.165402	0.058374	0.00460426	1
Insomnia - general	-0.0683982	0.0423605	0.106381		-0.0669479	0.0625668	0.28461	1
Intelligence	0.294533	0.0364732	6.73007e-16		0.306436	0.0520425	3.90489e-09	1
Social interction and isolation - loneliness	0.0555757	0.0510518	0.276324		0.0579441	0.0631343	0.35873	1
Age at menopause	0.0773001	0.0513951	0.132571		0.0316703	0.0754509	0.67467	1
Insomnia - morningness	-0.159483	0.0379336	2.61937e-05		-0.176408	0.0511359	0.00056103	1
Reading - phoneme awareness	0.175422	0.0875527	0.0451111		0.0497716	0.127502	0.696271	1
Sensitivity to environmental stress and adversity	-0.0488576	0.0390932	0.211382		-0.0678192	0.0568073	0.232539	1
Suicide attempt	0.0341957	0.0508557	0.501327		0.119502	0.0910932	0.189564	1
Cognitive traits - Trail making test b	0.164286	0.049234	0.000847345		0.248706	0.0693876	0.000337963	1
Cognitive traits - Verbal numerical reasoning	0.257611	0.0393163	5.66714e-11		0.304839	0.0558028	4.68745e-08	1
Note. Genetic correlations of male and female diagnosed ASD with the external traits after accounting for the internalizing factor. The table includes the standard errors of the genetic correlations, as well as the p-value and a p-value for the difference between the male and female correlations. Genetic correlations are ordered by p-value and significant correlations at a FDR corrected threshold…

## Sheet: Table S9
Table S9. Genetic Correlations of Early and Late Diagnosed ASD with External Traits Accounting for Genetic Overlap with the Internalizing Factor.
External Trait	Early Diagnosed ASD				Late Diagnosed ASD			Chi-Square Difference Test p-value
	rG	SE	p-value		rG	SE	p-value
Social interction and isolation - sports group	0.140792	0.0425179	0.00092843		-0.130982	0.0439268	0.00286544	1.34216e-07
Cognitive traits - symbol digit substitution	-0.174559	0.055416	0.00163289		0.180946	0.0543035	0.000861868	2.00624e-07
Cognitive traits - Trail making test b	-0.047652	0.0499003	0.339607		0.264554	0.0589746	7.26099e-06	5.45665e-06
Social interction and isolation - pub or social group	0.0414177	0.0462474	0.370483		-0.191079	0.0438043	1.28819e-05	4.12242e-05
Age at first sexual intercourse	0.0883576	0.0384762	0.021652		0.210238	0.0390008	7.02259e-08	6.14845e-05
Frequency of family and friends visit	-0.17381	0.048841	0.000372692		-0.410412	0.0446244	3.6799e-20	0.000113046
Cognitive traits - Memory	-0.0766119	0.0466124	0.10026		0.158303	0.0531665	0.00290613	0.000401907
Friendship satisfaction	-0.125838	0.0528077	0.0171752		-0.375779	0.0593571	2.43864e-10	0.000673374
Noncognitive skills of educational attainment	0.199899	0.0386245	2.27359e-07		0.0317836	0.0429756	0.459559	0.00185441
Cognitive traits - Verbal numerical reasoning	0.18796	0.03854	1.07706e-06		0.348804	0.0400555	3.09187e-18	0.00256867
Intelligence	0.206833	0.0342601	1.56861e-09		0.370878	0.038849	1.3396e-21	0.00440458
Insomnia - ease of getting up	-0.075613	0.0375169	0.0438585		-0.183634	0.0356031	2.49865e-07	0.00492137
Autism Spectrum Disorder	0.821019	0.0776424	3.91832e-26		0.632497	0.0768384	1.84839e-16	0.0101403
Diet - carbs	-0.0886007	0.0506112	0.0800127		0.077393	0.0515558	0.133315	0.0121066
Insomnia - general	-0.139866	0.0440807	0.00150897		0.00252934	0.0457481	0.95591	0.0136608
Ever considered self-harm	0.0799411	0.0693921	0.24931		0.283652	0.061043	3.37193e-06	0.0138115
Schizophrenia	0.187882	0.040241	3.02797e-06		0.077506	0.0355478	0.0292329	0.0197394
ADHD	0.111599	0.0475553	0.0189391		0.236833	0.0488195	1.22726e-06	0.0334444
Cannabis Use Disorder	0.00804865	0.0589983	0.891486		-0.156404	0.0658136	0.0174794	0.0492697
Diet - protein	0.0847718	0.0659505	0.198659		-0.0354628	0.060881	0.560233	0.0598612
Insomnia - morningness	-0.0394695	0.0362419	0.276129		-0.153439	0.0353928	1.4555e-05	0.0760563
Risk taking - number of sexual partners	0.0851001	0.0428689	0.0471303		0.0189411	0.0400583	0.636322	0.0846051
Social interction and isolation - religious group	0.0589923	0.047319	0.212511		0.113566	0.0439617	0.00978602	0.0879062
Age at menarche	-0.0879673	0.0345846	0.0109736		0.0156341	0.0357099	0.661523	0.0975176
Ability to confide	-0.0194159	0.042775	0.649896		-0.0892389	0.0489627	0.0683656	0.109951
Alzheimers disease	0.00699112	0.058942	0.905583		-0.132214	0.066913	0.0481656	0.133463
Asthma	-0.00937252	0.0489603	0.848187		0.0667363	0.0458829	0.145809	0.137062
Risk taking - automobile speeding propensity	-0.013719	0.0437239	0.753699		0.0500804	0.0444662	0.260056	0.141446
Cognitive traits - Reaction time	-0.0223108	0.0443673	0.61506		0.095462	0.0397622	0.0163583	0.162407
Childhood Intelligence	0.306079	0.0862981	0.000389989		0.181202	0.0941562	0.0542942	0.175268
Sensitivity to environmental stress and adversity	-0.00140648	0.0377056	0.97024		-0.0510349	0.0404135	0.206654	0.196621
Anorexia Nervosa	0.0633016	0.0546411	0.24666		0.116423	0.0594997	0.050383	0.225457
No exercise	-0.0697843	0.0607278	0.250502		0.00167532	0.0547761	0.975593	0.273161
Diet - fat	0.0913512	0.0599435	0.127521		0.0165976	0.062355	0.790099	0.279472
Reading - spelling	0.174856	0.0720014	0.0151609		0.0809406	0.0784524	0.302205	0.287205
Adulthood ADHD	-0.0721747	0.0685986	0.29274		0.0252414	0.0746178	0.735152	0.294112
Suicide attempt	-0.0359797	0.0699607	0.607055		0.0435169	0.0578865	0.452188	0.373008
Insomnia - napping	0.0884313	0.0552322	0.109359		0.149982	0.0579031	0.00959123	0.40389
Insomnia - dozing	0.0218199	0.0765875	0.775715		0.105358	0.0781894	0.177825	0.41381
Social interction and isolation - loneliness	0.0031213	0.042699	0.941725		0.0445734	0.0487611	0.360657	0.42302
Reading - phoneme awareness	0.0840857	0.0763431	0.270709		0.132709	0.0801975	0.0979708	0.424687
Alcohol Use Disorder	-0.035902	0.0927918	0.698817		-0.11566	0.0973592	0.234845	0.432416
Nocturnal Enuresis	-0.0550811	0.143999	0.702086		0.0851956	0.140574	0.54448	0.435802
Migraine	0.0618092	0.0936784	0.509382		-0.00824194	0.106777	0.938476	0.448708
Reading - nonword reading	0.222653	0.0732438	0.00236669		0.0890741	0.0704231	0.205928	0.494852
Opioid Use Disorder	-0.125142	0.125748	0.319648		-0.19815	0.126819	0.118178	0.513528
Insomnia - snoring	-0.0267787	0.0431312	0.534687		-0.0664455	0.0447814	0.137869	0.516033
Diet - sugar	-0.143059	0.0523788	0.0063096		-0.106908	0.0569927	0.0606783	0.587652
Aggression (childhood)	0.133493	0.0740809	0.0715471		0.182058	0.0719369	0.0113806	0.60895
Family satisfaction	-0.177412	0.0548303	0.00121363		-0.205066	0.0593786	0.000553283	0.61067
Hours of moderate exercise	-0.196741	0.0552907	0.000373248		-0.157697	0.0571303	0.00577462	0.678427
Language Functional Connectivity	-0.0137239	0.0308051	0.655952		-0.00194666	0.0314016	0.95057	0.753439
Educational Attainment	0.268192	0.0330289	4.66458e-16		0.271004	0.0329169	1.82631e-16	0.757175
Age at first facial hair	0.0179098	0.0395816	0.650927		0.00657476	0.0452443	0.884458	0.798482
Childhood BMI	0.0703278	0.0676429	0.298485		0.0581666	0.0617619	0.346301	0.799022
Tourette's Syndrome	0.0778899	0.0708793	0.271808		-0.017718	0.070463	0.801474	0.803008
Adulthood BMI	-0.0305087	0.0360707	0.397662		-0.0171021	0.0293086	0.559546	0.835405
Childhood ADHD	0.173351	0.0629486	0.00588985		0.228174	0.0700444	0.0011237	0.845607
Insomnia - sleep duration	0.0129974	0.0423343	0.75883		0.00460794	0.0403359	0.909045	0.866793
Reading - word reading	0.154001	0.0747092	0.0392704		0.0933157	0.0663239	0.159437	0.88488
Bipolar Disorder	0.107055	0.0469751	0.0226691		0.0950358	0.0403671	0.0185585	1
Ever self-harmed	0.119606	0.0869788	0.169093		0.176845	0.0952105	0.0632524	1
Age at menopause	0.0852454	0.046437	0.0663979		0.0423163	0.0504218	0.401333	1
Obsessive Compulsive Disorder	0.0606847	0.0844279	0.472278		0.0168817	0.0832605	0.839324	1
Risk taking - general risk tolerance	-0.0407838	0.0442441	0.356632		-0.0262474	0.0423804	0.535696	1
Note. Genetic correlations of early and late diagnosed ASD with the external traits after accounting for the internalizing factor. The table includes the standard errors of the genetic correlations, as well as the p-value and a p-value for the difference between the male and female correlations. Genetic correlations are ordered by p-value and significant correlations at a FDR corrected threshold …
